# Supplementary material for: Immune Surveillance in Clinical Regression of Preinvasive Squamous Cell Lung Cancer
Source: Oxford University Press journal article supplement (doi:10.1158/2159-8290.cd-19-1366), 2020-07-20
Supplement: 21598290cd191366-sup-232797_2_supp_6389477_qc4q29.docx [file 21598290cd191366-sup-232797_2_supp_6389477_qc4q29.docx]

**Supplementary Information**

This file contains the following:

- Supplementary Methods
- Legends for Supplementary Tables S1-S5 (available as separate Excel files)
- Supplementary Figures S1-S11

**Supplementary Methods**

**Comparison of Microarray Platforms**

As described above, our previous work performed gene expression profiling using both Illumina and Affymetrix microarray platforms (GEO platform IDs GPL13534 and GPL18281 respectively), with Illumina data used for discovery analysis and Affymetrix as a validation set. Our previous publication did not identify clear differences in immune pathways between progressive and regressive lesions based on the Illumina discovery set, yet a similar analysis of the Affymetrix dataset does identify two significant immune-related KEGG pathways(1): cytokine-cytokine interaction (hsa04060) and type I diabetes mellitus (hsa04940). We therefore questioned whether this disparity may be due to platform differences.

The Affymetrix platform used has many more probes than the Illumina platform, allowing coverage of more genes and coverage of multiple transcripts for some genes. To examine the impact of these differences we performed pathway analysis on the Illumina and Affymetrix datasets separately, then repeated this analysis using only probes that were shared by both platforms and were unambiguous (i.e. had a one-to-one mapping to a given gene on *both* microarray platforms). Using a Gene Set Enrichment Analysis (GSEA) method, we found two immune-related KEGG pathways to be significant in the Affymetrix dataset but not the Illumina dataset: cytokine-cytokine interaction (hsa04060) and type I diabetes mellitus (hsa04940). Both of these pathways included genes which were not profiled in the Illumina dataset, and indeed when the Affymetrix dataset was reduced to include only shared unambiguous probes hsa04940 was no longer significant and hsa04060 showed a smaller effect size. Chromosomal instability related genes – the most important finding from our previous work – remained significant across all analyses. Some genes which are important to our present analysis are not covered by the Illumina microarray, including TNFSF9, CXCL8 and CD274. We believe these differences justify our decision to focus on the Affymetrix platform, as it offers wider coverage of important immune genes. Pathway analysis results are included in Supplementary Table 5.

**Histological Classification**

For samples identified by the above process, multiple serial sections were cut and staining with hematoxylin and eosin (H&E) was performed. The H&E slide was used to identify regions of CIS and adjacent stroma; slides were independently reviewed by two pathologists (M.F. and D.M.). In equivocal cases, regions considered “high grade” (CIS or severe dysplasia) were included whereas any region with the appearance of low-grade histology was excluded. H&E slides were used for image analysis; serial sections were used for immunohistochemistry and molecular analyses.

**Image analysis**

All slides were scanned using NanoZoomer Digital Pathology System scanner model C9600-01, using NDP.scan version 2.5.89 (Hamamatsu, Japan).

To spatially map single-cells from NSCLC tumour microenvironment using H&E images, an automated deep learning pipeline was used(2). The single-cell neighboring ensemble classifier was trained using 21,009 single-cell annotations by thoracic pathologists from NSCLC samples in the TRACERx100 cohort(3). Four distinct cell types from H&E images were identified: cancer cells, lymphocytes that included leukocytes and plasma cells, stromal cells that included fibroblasts and endothelial cells, and an “other” cell type that included non-identifiable and less abundant cells such as macrophages, chondrocytes, and pneumocytes. As described in (2), a customised implementation of spatially constrained convolution neural networks(4) for TensorFlow was used for the single cell classification and detection tasks. The deep learning pipeline was validated using 5,951 pathological annotations within TRACERx, and to support its generalizability, 5,082 annotations collected externally on an independent cohort, the LATTICe-A study(5). Biological validation of this pipeline against immunohistochemistry data for the identification of cancer, lymphocyte and stromal cells has been previously described(2).

**IHC**

2-5μm tissue sections were cut and transferred onto poly-l-lysine–coated slides, dewaxed in two changes of xylene and rehydrated in a series of graded alcohols. Details of the primary antibodies used are as follows:

- SP35: Anti-CD4 Rabbit monoclonal antibody from Abcam Plc, Cambridge, UK.
- SP239: Anti-CD8 Rabbit monoclonal antibody from Abcam Plc, Cambridge, UK.
- 236A/E7: Anti-FOXP3 Mouse antibody, Kind gift from Dr G Roncador, CNIO, Madrid (Spain).
- Anti-4-1BBL (Cat No: ab223160)
- Anti -CCL27/CTACK (Cat No: MAB376)
- Anti-GPR2/CCR10 (Cat No: ab3904)

Single immunohistochemistry was carried out using the automated platforms BenchMark Ultra (Ventana/Roche) and the Bond-III Autostainer (Leica Microsystems) according to a protocol described elsewhere(6,7). To establish optimal staining conditions (i.e. antibody dilution and incubation time, antigen retrieval protocols, suitable chromogen) each antibody was tested and optimized on sections of human reactive tonsil, used as positive control.

Multiplex immunohistochemistry was carried out using a protocol described previously(7). Co-expression of nuclear and cytoplasmic or membranous proteins was easy to detect, as the colour of the chromogens remained distinct. Specificity of the staining was assessed by a haematopathologist (TM) with expertise in multiplex-immunostaining. Slides were scanned using the Hamamatsu Nanozoomer digital scanner as described above.

For T cell subset quantification, a similar deep learning pipeline was used(2). The convolutional neural networks were trained on sample TRACERx IHC CD4/CD8/FOXP3 images using 9,333 single-cell annotations by pathologists and validated against 6 NSCLC independent images using 5,028 annotations. The IHC algorithm classified cells into four classes: CD8+, CD4+, FOXP3+ and “other” cell class (hematoxylin cells). When comparing cell counts between samples, absolute counts were divided by the region area. Regions of CIS and stroma within a slide were quantified separately, with regions annotated manually by the investigators.

For quantification of novel markers (TNFSF9, CCL27, CCR10), where similar training data was not available, QuPath version 0.2.0(8) was used to segment cells and export per-cell intensity values for cells within annotated CIS regions. A marker-specific minimum intensity threshold was chosen to remove slides with poor staining. For the remaining slides, intensity values were fitted to a model representing a mixture of two normal distributions, representing stain-negative and stain-positive cells. Probabilities of a cell belonging to each group were calculated, and likely staining status assigned. Modelling was performed using the R package *mixtools*(9).

**Quantitative multiplex immunohistochemistry**

Multiplex chromogenic immunohistochemistry (IHC) was performed on FFPE section according to a previously published protocol(10,11). Briefly, after deparaffinization, the slides were stained with hematoxylin for 1min (Dako S3301) and tissue sections were scanned using Aperio ImageScope. Then, heat-mediated antigen retrieval (Citrate buffer pH6) was conducted and the endogenous peroxidase activity was blocked (Dako S2003). Sequential IHC consisting of iterative cycles of staining (2 rounds per cycle), scanning and stripping, were performed. Primary antibodies were added in the following order:

|  |  | Cycle 1 | Cycle 2 | Cycle 3 | Cycle 4 | Cycle 5 | Cycle 6 | Cycle 7 | Cycle 8 | Cycle 9 |
| --- | --- | --- | --- | --- | --- | --- | --- | --- | --- | --- |
|  | Hematoxylin | Round 1 | Round 1 | Round 1 | Round 1 | Round 1 | Round 1 | Round 1 | Round 1 | Round 1 |
| Primary Ab |  | PD1 | HLA DR/DP/DQ | CD3 | CD8 | GranzymeB | CD66b | CD163 | Foxp3 | Ki67 |
| Supplier |  | Abcam | LS-Bio | Abcam | Invitrogen | Abcam | StemCell | Abcam | Invitrogen | Abcam |
| Clone |  | NAT105 | WR18 | CD3-12 | SP16 | Poly | G10E5 | 10D6 | 236A/E7 | SP6 |
| Concentration |  | 1/50 | 1/500 | 1/500 | 1/100 | 1/100 | 1/200 | 1/100 | 1/40 | 1/500 |
|  |  |  |  |  |  |  |  |  |  |  |
|  |  | Round 2 | Round 2 | Round 2 | Round 2 | Round 2 | Round 2 |  | Round 2 | Round 2 |
| Primary Ab |  | PDL1 | DC-Lamp | CD45 | CD20 | CD68 | CD11b |  | EOMES | PanCK |
| Supplier |  | Cell signaling | Novus Bio | BioLegend | Abcam | Abcam | Abcam |  | Millipore | Abcam |
| Clone/Product |  | E1L3N | 1010E1.01 | H130 | L26 | PG-M1 | EPR1344 |  | poly | AE1/AE3 |
| Concentration |  | 1/50 | 1/100 | 1/100 | 1/1000 | 1/50 | 1/1000 |  | 1/1000 | 1/2000 |
|  |  |  |  |  |  |  |  |  |  |  |
|  |  | Round 3 |  |  |  |  |  |  |  | Round 3 |
|  |  | Hematoxylin |  |  |  |  |  |  |  | Hematoxylin |

The secondary HRP-conjugated antibodies anti-mouse and anti-rabbit used were Histofine® Simple StainTM (MAX PO, Nichirei biosciences) and biotinylated anti-rat antibody (BA-4001, Vector laboratories). Peroxidase detection was performed with AEC solution (SK-4200, Vector laboratories). After each round, AEC was removed by ethanol washes and HRP inactivated with Dako S2003. After each cycle the antibodies were stripped with heat-mediated antigen retrieval (Citrate buffer pH6). All the images were processed as per method described previously(10,11). Data analysis was performed on carcinoma and stromal area using FCS Express 7 Image Cytometry software (De Novo Software), based on lineage markers described in Supplementary Table 2.

**Neoantigen prediction and LOHHLA**

HLA typing was performed using Optitype(12) on germline (blood) WGS data from each patient. This was used as input for netMHCpan 4.0(13,14) for neoantigen prediction; 9-, 10- and 11-mer peptides were considered for each somatic mutation, called using methods described above. To assess for quantitative differences between neoantigens in the progressive and regressive groups, we compared their binding affinities (as calculated by netMHCpan) and their differential agretopicity index (DAI), defined as the difference in binding affinity between mutant and wild-type peptides. Significant differences in these values were not observed between the regressive and progressive groups.

The same HLA typing data was used as input to the LOHHLA tool(15) (Loss of Heterozygosity in Human Leukocyte Antigen), alongside copy number, purity and ploidy data derived from ASCAT. This tool assesses each sample for the presence of LOH in the HLA region – a difficult task due to polymorphism in this region. Output plots from LOHHLA were visually checked prior to calling the presence or absence of HLA LOH in a sample.

**DMR analysis**

Methylation data analysis was performed using the Chip Analysis Methylation Pipeline (ChAMP) Bioconductor package with default settings(16). The functions champ.DMP() and champ.DMP() were used to identify differentially methylated probes (DMPs) and differentially methylated regions (DMRs) respectively. Annotation of DMPs and DMRs with affected genes is performed by default within these functions.

A criticism raised against this analysis is the identification of DMRs affecting a highly polymorphic region of chromosome 6. However, we argue that this is a differential analysis between two groups (progressive and regressive), with results replicated in an independent dataset from TCGA (Cancer vs Control data), therefore should not be affected by polymorphism unless the underlying HLA types are significantly different between the two groups. For each identified HLA type, based on 4-digit resolution, we compared the number of patients identified in the progressive and regressive groups using a Fisher’s exact test, and did not find any HLA types to be significant with p < 0.05.

**Immune cell quantification from GXN data**

To estimate relative immune cell populations from gene expression data we applied the method of Danaher et al.(17) This method was chosen as it has been shown to out-perform similar methods when benchmarked against immunohistochemistry in a large analysis of early-stage invasive lung cancer(18). Briefly, for each of 15 immune cell types, a small set of genes is defined which has been shown to correlate with the presence of that cell type. For each cell type, the mean expression of its associated genes gives a ‘score’ for that cell type. If a gene is not measured by the Affymetrix microarray used, that gene is ignored.

A ‘TIL score’, estimating the overall infiltration of lymphocytes into the tissue, is calculated by taking the mean of 10 individual cell type scores (B-cells, Cytotoxic cells, Exhausted CD8, Macrophages, Neutrophils, NK CD56dim cells, NK cells, T-cells, Th1 cells, CD8 T cells). This process is encoded in the R function do.danaher(), which is available from the Github repository accompanying this paper.

In order to further justify our choice of the Danaher method, we compared the results with two different methods: the Davoli method and CIBERSORT using LM22. As CIBERSORT gives relative data, we adjusted these results using tumour purity estimates from ESTIMATE. We found poor correlation between the three methods, therefore we assessed each against mIHC data as a ‘gold standard’. Due to the very small sample size these data were not performed on the same samples, yet we expected to see similar changes between progressive and progressive groups for any cell type showing a significant signal (p<0.05). Using this comparison, we found Danaher performed well for CD8 cells, but did not correlate well with mIHC data for overall numbers of T-cells, macrophages or Tregs. We therefore remove these cell types from our downstream analyses.

**Immune cell quantification from methylation data**

Similar immune quantification from methylation data was performed using methylCIBERSORT(19). Methylation data was first converted to a mixture file using the methylCIBERSORT R package version 0.2.0. A signature file for squamous cell lung cancer was also taken from this package; this signature was derived from TILs in squamous cell lung cancer, a very similar biological question to that of our study. These data were used as input to CIBERSORT(20) to provide relative values for each immune cell subtype included in the signature file.

**Correlation of smoking status with outcome**

As described in the main text, we hypothesized that the immunosuppressive effects of active smoking would reduce immune infiltrates and increase risk of progression. We confirmed this result using a Cochrane-Armitage test for trend to identify decreasing infiltrates / increasing progression risk from never to former to current smokers (here defining a sample as ‘infiltrated’ if lymphocytes per unit area quantified from H&E imaging was above the median value). To ensure this result was not driven by multiple samples from a few patients we applied a bootstrapping method to correct for multiple patient samples. We ran 1,000 simulations in which we selected one sample at random from each patient and calculated a Cochrane-Armitage p-value for trend. From these data we present mean p-values in the text, with confidence intervals calculated as 2 standard deviations from the mean.

**References**

1. Kanehisa M, Goto S. KEGG: kyoto encyclopedia of genes and genomes. Nucleic Acids Res. 2000;28:27–30.

2. AbdulJabbar, K. Geospatial immune variability illuminates differential evolution of lung adenocarcinoma. Nature Medicine (accepted for publication). 2020;

3. Jamal-Hanjani M, Wilson GA, McGranahan N, Birkbak NJ, Watkins TBK, Veeriah S, et al. Tracking the Evolution of Non-Small-Cell Lung Cancer. N Engl J Med. 2017;376:2109–21.

4. Sirinukunwattana K, Raza SEA, Tsang Y, Snead DRJ, Cree IA, Rajpoot NM. Locality Sensitive Deep Learning for Detection and Classification of Nuclei in Routine Colon Cancer Histology Images. IEEE Transactions on Medical Imaging. 2016;35:1196–206.

5. Moore DA, Sereno M, Das M, Acevedo JDB, Sinnadurai S, Smith C, et al. In situ growth in early lung adenocarcinoma may represent precursor growth or invasive clone outgrowth—a clinically relevant distinction. Modern Pathology. 2019;1.

6. Akarca AU, Shende VH, Ramsay AD, Diss T, Pane-Foix M, Rizvi H, et al. BRAF V600E mutation-specific antibody, a sensitive diagnostic marker revealing minimal residual disease in hairy cell leukaemia. Br J Haematol. 2013;162:848–51.

7. Marafioti T, Jones M, Facchetti F, Diss TC, Du M-Q, Isaacson PG, et al. Phenotype and genotype of interfollicular large B cells, a subpopulation of lymphocytes often with dendritic morphology. Blood. 2003;102:2868–76.

8. Bankhead P, Loughrey MB, Fernández JA, Dombrowski Y, McArt DG, Dunne PD, et al. QuPath: Open source software for digital pathology image analysis. Scientific Reports. Nature Publishing Group; 2017;7:16878.

9. Benaglia T, Chauveau D, Hunter DR, Young DS. mixtools: An R Package for Analyzing Mixture Models. Journal of Statistical Software. 2009;32:1–29.

10. Tsujikawa T, Kumar S, Borkar RN, Azimi V, Thibault G, Chang YH, et al. Quantitative Multiplex Immunohistochemistry Reveals Myeloid-Inflamed Tumor-Immune Complexity Associated with Poor Prognosis. Cell Reports. 2017;19:203–17.

11. Banik G, Betts CB, Liudahl SM, Sivagnanam S, Kawashima R, Cotechini T, et al. High-dimensional multiplexed immunohistochemical characterization of immune contexture in human cancers. Meth Enzymol. 2020;635:1–20.

12. Szolek A, Schubert B, Mohr C, Sturm M, Feldhahn M, Kohlbacher O. OptiType: precision HLA typing from next-generation sequencing data. Bioinformatics. 2014;30:3310–6.

13. Andreatta M, Nielsen M. Gapped sequence alignment using artificial neural networks: application to the MHC class I system. Bioinformatics. 2016;32:511–7.

14. Nielsen M, Lundegaard C, Worning P, Lauemøller SL, Lamberth K, Buus S, et al. Reliable prediction of T-cell epitopes using neural networks with novel sequence representations. Protein Sci. 2003;12:1007–17.

15. McGranahan N, Rosenthal R, Hiley CT, Rowan AJ, Watkins TBK, Wilson GA, et al. Allele-Specific HLA Loss and Immune Escape in Lung Cancer Evolution. Cell. 2017;171:1259-1271 e11.

16. Morris TJ, Butcher LM, Feber A, Teschendorff AE, Chakravarthy AR, Wojdacz TK, et al. ChAMP: 450k Chip Analysis Methylation Pipeline. Bioinformatics. 2014;30:428–30.

17. Danaher P, Warren S, Dennis L, D’Amico L, White A, Disis ML, et al. Gene expression markers of Tumor Infiltrating Leukocytes. J Immunother Cancer. 2017;5:18.

18. Rosenthal R, Cadieux EL, Salgado R, Bakir MA, Moore DA, Hiley CT, et al. Neoantigen-directed immune escape in lung cancer evolution. Nature. 2019;1.

19. Chakravarthy A, Furness A, Joshi K, Ghorani E, Ford K, Ward MJ, et al. Pan-cancer deconvolution of tumour composition using DNA methylation. Nature Communications. 2018;9:3220.

20. Newman AM, Liu CL, Green MR, Gentles AJ, Feng W, Xu Y, et al. Robust enumeration of cell subsets from tissue expression profiles. Nature Methods. 2015;12:453–7.

**Supplementary Tables**

Supplementary tables S1-5 are included as Excel files. Legends are presented here.

**Table S1**. Details of molecular investigations performed on each sample. Clinical and outcome data is also presented. In all cases with a previous history of lung cancer, this was of squamous histology.

**Table S2**. Markers used to define cell types in quantitative multiplex immunohistochemistry experiments.

**Table S3.** Immune cell deconvolution from molecular data. Relative proportions of immune cell subtypes are predicted from gene expression data using the Danaher method, and from methylation data using methylCIBERSORT. Differences between progressive and regressive groups are reported here.

**Table S4**. Gene lists used in this analysis.

**Table S5**. Pathway analysis comparing the illumina and Affymetrix datasets as described in Supplementary Methods.

**Supplementary Figures**

**Figure S1. Summary of analyses performed on each CIS sample.** Due to technical limitations related to the small size of bronchoscopic biopsies, not all analyses were performed on all samples. Table S1 provides a detailed reference of analyses performed on a per-sample basis. Methodology for sample selection for each analysis modality is provided in methods.

**Figure S2. Proinflammatory cytokines are upregulated in regressive lesions.**

Comparing transcriptomic data from progressive CIS lesions (n=10) with regressive (n=8) we find regressive lesions express higher levels of cytokines classically considered to be pro-inflammatory (a) but not anti-inflammatory (b) within the epithelium. The pro:anti-inflammatory ratio is higher in regressive lesions (c). Transcriptomic data from laser-captured stroma adjacent to the same lesions does not show any difference in cytokine expression between progressive and regressive lesions (d-f). Expression values shown are the geometric means of gene expression data for 9 pro-inflammatory and 7 anti-inflammatory cytokines. p-values are calculated using linear mixed effects modelling to account for samples from the same patient.

**Figure S3. Expression of individual cytokines in progressive and regressive CIS lesions.**

Continuing the analysis of transcriptomic data from progressive CIS lesions (n=10) with regressive (n=8) shown in Figure S2, we demonstrate the contributions of individual pro-inflammatory cytokines (a) and anti-inflammatory cytokines (b). We see upregulation of several pro-inflammatory cytokines in regressive lesions*: IL12A, IL2, IL23A* and *TNF*. *CXCL8*, which is associated with macrophages, is downregulated in regressive lesions. p-values are calculated using linear mixed effects modelling to account for samples from the same patient.

**Figure S4. Effects of smoking on progression risk and lymphocyte infiltration.**

Smoking status was available for 132 CIS lesions from 59 patients (24 lesions from 13 current smokers; 104 from 43 former smokers; 4 from 3 never smokers). Here we show the absolute (a) and relative (b) numbers of lesions in each group which progressed to cancer. Using a Cochrane-Armitage test to look for a trend from current to former to never smokers, we found a trend towards higher chance of regression (p=0.002). To account for samples from the same patient, we randomly selected one sample per patient and repeated this Cochrane-Armitage test, obtaining a p-value < 0.1 irrespective of sample choice (c). Similarly, we show the absolute (d) and relative (e) numbers of lesions which are “infiltrated”, defined as having above the median number of infiltrating lymphocytes per unit area. Again, we observe a trend towards higher infiltration from current to former to never smokers, which is reasonably robust to sample selection (f). Similar plots dividing the former-smoking group by time since quitting (g-j) do not show a trend towards increased chance of regression or increased lymphocytic infiltration over time.

**Figure S5. Neoantigen analysis of progressive versus regressive lesions.**

Predicted neoantigen load correlates closely with mutational burden (a). Therefore, progressive samples, which harbor more mutations, have more neoantigens (b). This remains true when the analysis is limited to clonal neoantigens (c). The proportion of clonal neoantigens was similar (d). Considering the individual predicted neoantigens, there was no qualitative difference between progressive and regressive samples; they were similar in terms of binding affinity (e), rank binding affinity (f) and differential agretopicity index (DAI) (g). The ratio of observed to expected neoantigens (‘depletion score’) was similar between progressive and regressive lesions (h). The p-value for figure (a) was calculated using Pearson’s product moment; p-values for figures (b)-(h) were calculated using a Wilcoxon rank-sum test.

**Figure S6. Aberrant methylation of the HLA region is a feature of progressive CIS and cancer.** (a) Differentially methylated regions across the genome, calculated for progressive vs regressive CIS (outer circle) and for cancer vs control (inner circle). Hypermethylated DMRs are plotted in yellow, hypomethylated in blue. Genes involved in the MHC class I mechanism are highlighted. In both comparisons a cluster is observed on chromosome 6, which includes all main HLA regions. (b) Selection of three probes covering the *HLA-A* gene, all showing marked hypermethylation in a subset of progressive samples and hence suggesting an epigenetic mechanism for reduced *HLA-A* in these samples.

**Figure S7. Epigenetic silencing of antigen-presenting genes in squamous cell lung cancers.** Correlations of expression and methylation data from TCGA (a) and CIS (b) for key antigen-presentation genes demonstrates clear evidence of epigenetic silencing. Silencing is also seen for other cancer-associated, suggesting that demethylating agents may have wider benefits than improving antigen presentation. However, some key immune genes including immunomodulatory molecule *TNFSF9* and MHC II regulator *CIITA* show a positive correlation with methylation, suggesting that demethylating agents may not be universally beneficial on the immune response. Correlation coefficients shown are calculated using Pearson’s product moment. TNFSF9 is excluded from CIS analysis as it is not profiled by Illumina microarrays; insufficient samples were profiled with both Affymetrix microarrays and methylation arrays.

**Figure S8. Methylation patterns over antigen-presenting genes.** Methylation patterns are shown for antigen presentation genes *HLA-A, HLA-B, HLA-C, TAP1* and *B2M*, as well as the immunomodulator *TNFSF9*. Methylation data is generated from Illumina 450k microarrays, which measure methylation at 450,000 probes across the genome. In each plot, the x-axis shows the genomic location of each probe related to the gene of interest; TSS 200 and TSS1500 represent Transcription Start Site regions. On the y-axis, probe values are shown for each sample, coloured as progressive (red; n=36), regressive (green; n=18) or control (blue; n=33). Loess lines for each sample group are shown, with error bars in grey. We see a pattern of promoter hypermethylation in progressive samples for the majority of these genes, consistent with epigenetic silencing. An exception is *TNFSF9* which shows predominantly body hypermethylation; this is consistent with the observation that hypermethylation of *TNFSF9* increases expression.

**Figure S9. Comparisons of immune checkpoint molecules between progressive and regressive CIS samples**. Here we show gene expression values of immune checkpoint molecules for each individual CIS lesion, showing both progressive (red; n=10) and regressive (blue; n=8). Although only *TNFSF9* reaches a significance threshold of FDR < 0.05 on differential expression analysis, other genes show outlier samples in the progressive group. Defects in these genes may be a critical immune escape mechanism in these outlier samples.

**Figure S10. The *CCL27:CCR10* axis is upregulated in progressive samples and correlates with *PIK3CA*/*AKT1* expression.**

We compared ligand:receptor expression for each of 52 known cytokine:receptor pairs in 18 CIS lesions (n=10 progressive, 8 regressive). Only *CCL27:CCR10* was significantly different between progressive and regressive lesions (FDR 0.003; Figure 4). Progressive samples showed upregulated *CCL27* and downregulated *CCR10*. *CCL27* activation of *CCR10* has been shown to promote immune escape in mouse models, with the PIK/Akt pathway implicated as a potential mechanism. In CIS data, *CCL27* expression correlates with expression of both *PIK3CA* (a) and *AKT1* (b). Correlation coefficients are calculated using Pearson’s product moment.

**Figure S11. Late-progressive lesions are immunologically similar to regressive.**

Of 53 lesions that met the clinical endpoint for regression – defined as a subsequent biopsy showing normal epithelium or low-grade dysplasia – 11 developed cancer later at the same site. These are termed ‘late progressive’ lesions. Combined quantitative immunohistochemistry data (n=44; 28 progressive, 16 regressive) with lymphocyte quantification from H&E images (n=112; 68 progressive, 44 regressive) are shown. We observe a similar trend of increased lymphocytes and CD8+ cells in regressive and late progressive samples compared to progressive. We also observe increased stromal lymphocytes in the late progressive group (p=0.037). Quoted p-values are calculated using ANOVA to reject the null hypothesis that all groups are equal, based on a linear mixed model to correct for multiple samples per patient; *p<0.05, #p<0.1. Post-hoc pairwise comparisons using a Tukey HSD test were performed but sample size was insufficient to show significant results.
