# Supplementary material for: Immune Surveillance in Clinical Regression of Preinvasive Squamous Cell Lung Cancer
Source: Oxford University Press journal article supplement (doi:10.1158/2159-8290.cd-19-1366), 2020-07-20
Supplement: 21598290cd191366-sup-232797_2_supp_6389494_qc5q2g.xlsx [file 21598290cd191366-sup-232797_2_supp_6389494_qc5q2g.xlsx]

## Sheet: pheno.public
SampleID	Patient.Number	Biopsy.Site	Whole.Genome.Sequencing	Methylation	Gene.expression	Gene.Expression.Platform	Stroma.GXN	HandE	IHC_K	Outcome.x	SmokingStatus	progression	Gender	COPD	Pack.years	Age.at.bronchoscopy	Previous.lung.cancer	Sample.Number..WGS.	Sample.Number..Meth.	Sample.Number..GXN.	Sample.Number..Stroma.	late.progression
S1	2	LLL	FALSE	FALSE	TRUE	Illumina	FALSE	TRUE	FALSE	Progression	Unknown	1	F	NO	50	77	FALSE			Progressive.9
S2	4	LUL	FALSE	FALSE	TRUE	Illumina	FALSE	TRUE	FALSE	Progression	Former	1	M	YES	100	66	FALSE			Progressive.14
S3	5	RUL	FALSE	FALSE	TRUE	Illumina	FALSE	TRUE	FALSE	Progression	Former	1	M	NO	38	55	FALSE			Progressive.17
S4	6	Lingula	FALSE	FALSE	TRUE	Illumina	FALSE	TRUE	FALSE	Regression	Former	0	M	NO	141	62	FALSE			Regressive.16
S5	6	RLL-Ap.Seg	FALSE	TRUE	FALSE		FALSE	FALSE	FALSE	Regression	Former	0	M	NO	141	66	FALSE		X2_R
S6	6	LLL Apical	FALSE	TRUE	TRUE	Illumina	FALSE	TRUE	FALSE	Progression	Former	1	M	NO	141	62	FALSE		X1_P	Progressive.6
S7	9	LUL	FALSE	FALSE	TRUE	Illumina	FALSE	TRUE	FALSE	Progression	Unknown	1	M	NO		69	TRUE			Progressive.20
S8	11	LLL stump	FALSE	FALSE	TRUE	Illumina	FALSE	TRUE	FALSE	Progression	Former	1	M	YES	40	75	TRUE			Progressive.3
S9	11	LUL	TRUE	TRUE	FALSE		FALSE	TRUE	TRUE	Progression	Former	1	M	YES	40	79	TRUE	PD21888a	X3_P
S10	12	Post.Wall Prox.RMB	TRUE	TRUE	FALSE		FALSE	FALSE	TRUE	Progression	Former	1	M	NO	60	70	TRUE	PD21894e	X11_P
S11	12	LMB	FALSE	TRUE	FALSE		FALSE	TRUE	FALSE	Progression	Former	1	M	NO	60	64	TRUE		X7_P
S12	12	Lower trachea	TRUE	TRUE	FALSE		FALSE	TRUE	TRUE	Progression	Former	1	M	NO	60	68	TRUE	PD21894g	X8_P
S13	12	LUL stump	FALSE	TRUE	TRUE	Illumina	FALSE	TRUE	FALSE	Progression	Former	1	M	NO	60	64	TRUE		X9B_P	Progressive.7
S14	12	Orifice of RMB lat.wall	TRUE	TRUE	FALSE		FALSE	TRUE	TRUE	Progression	Former	1	M	NO	60	70	TRUE	PD21894c	X10_P
S15	12	Left Lat.Wall of Trachea	TRUE	TRUE	FALSE		FALSE	FALSE	FALSE	Progression	Former	1	M	NO	60	70	TRUE	PD21894d	X6_P
S16	12	RMB	TRUE	TRUE	FALSE		FALSE	TRUE	TRUE	Progression	Former	1	M	NO	60	70	TRUE	PD21894a	X12_P
S17	12	L main prox	FALSE	TRUE	FALSE		FALSE	TRUE	FALSE	Progression	Former	1	M	NO	60	64	TRUE		X5_P
S18	12	RML	TRUE	TRUE	FALSE		FALSE	TRUE	TRUE	Progression	Former	1	M	NO	60	73	TRUE	PD21894f	X42_P
S19	15	LLL	FALSE	FALSE	TRUE	Illumina	FALSE	TRUE	FALSE	Regression	Unknown	0	F	NO		57	FALSE			Regressive.15
S20	17	LMB	TRUE	TRUE	FALSE		FALSE	TRUE	TRUE	Progression	Unknown	1	M	YES		67	TRUE	PD21897a	X13_P
S21	25	LUL stump	FALSE	TRUE	TRUE	Illumina	FALSE	TRUE	FALSE	Regression	Former	0	M	NO	84	76	TRUE		X5_R	Regressive.5
S22	26	Lobec 1&5 stump	FALSE	TRUE	FALSE		FALSE	TRUE	TRUE	Progression	Current	1	M	YES	40	75	TRUE		X14_P
S23	26	MC	TRUE	TRUE	FALSE		FALSE	TRUE	FALSE	Progression	Current	1	M	YES	40	75	TRUE	PD21898a	X15_P
S24	27	LUL orifice	FALSE	FALSE	TRUE	Illumina	FALSE	TRUE	FALSE	Progression	Unknown	1	M	NO		70	FALSE			Progressive.8
S25	37	RLL	FALSE	FALSE	TRUE	Illumina	FALSE	TRUE	FALSE	Regression	Current	0	M	NO	45	59	FALSE			Regressive.12
S26	39	Trachea Anterior	FALSE	FALSE	TRUE	Illumina	FALSE	TRUE	FALSE	Regression	Former	0	M	NO	100	61	FALSE			Regressive.3		TRUE
S27	56	RUL	TRUE	TRUE	FALSE		FALSE	TRUE	TRUE	Progression	Former	1	M	NO	65	70	TRUE	PD21899a	X17_P
S28	58	LUL	FALSE	TRUE	FALSE		FALSE	TRUE	FALSE	Regression	Former	0	M	NO	50	75	TRUE		X28_R
S29	60	RLL Ap.Seg.	TRUE	TRUE	TRUE	Illumina	FALSE	TRUE	TRUE	Progression	Former	1	M	NO	32	74	TRUE	PD21902a	X19_P	Progressive.2
S30	61	MC	FALSE	TRUE	FALSE		FALSE	FALSE	FALSE	Regression	Unknown	0	M	NO	88	79	TRUE		X24_R
S31	63	LLL bas seg	FALSE	TRUE	FALSE		FALSE	FALSE	FALSE	Progression	Former	1	M	YES	45	73	FALSE		X41_P
S32	64	MC	FALSE	TRUE	TRUE	Illumina	FALSE	TRUE	FALSE	Regression	Former	0	M	YES	23	53	FALSE		X8_R	Regressive.8
S33	64	RUL	FALSE	TRUE	FALSE		FALSE	FALSE	FALSE	Regression	Former	0	M	YES	23	53	FALSE		X7_R
S34	73	RLL	FALSE	TRUE	FALSE		FALSE	FALSE	FALSE	Regression	Former	0	M	YES	35	56	FALSE		X12_R
S35	73	RUL	FALSE	TRUE	FALSE		FALSE	FALSE	FALSE	Regression	Former	0	M	YES	35	53	FALSE		X9_R
S36	73	LUL	TRUE	TRUE	FALSE		FALSE	TRUE	TRUE	Regression	Former	0	M	YES	35	53	FALSE	PD21904d	X10_R
S37	76	LLL stump	FALSE	TRUE	FALSE		FALSE	FALSE	FALSE	Progression	Former	1	M	NO	60	60	TRUE		X22_P
S38	76	LUL	FALSE	FALSE	TRUE	Illumina	FALSE	TRUE	FALSE	Regression	Former	0	M	NO	60	60	TRUE			Regressive.6
S39	77	LUL	TRUE	TRUE	FALSE		FALSE	TRUE	TRUE	Progression	Unknown	1	M	NO		72	FALSE	PD21905a	X24_P
S40	81	Posterior carina	FALSE	FALSE	TRUE	Illumina	FALSE	TRUE	FALSE	Regression	Former	0	M	NO	22	81	TRUE			Regressive.11
S41	81	RLL Apical seg	FALSE	FALSE	TRUE	Illumina	FALSE	TRUE	FALSE	Progression	Former	1	M	NO	22	80	TRUE			Progressive.5
S42	87	LLL Med.bas.	TRUE	TRUE	FALSE		FALSE	TRUE	TRUE	Progression	Former	1	M	YES	100	79	TRUE	PD21906a	X26_P
S43	89	RUL Post.wall	FALSE	FALSE	TRUE	Illumina	FALSE	TRUE	FALSE	Progression	Current	1	F	YES	40	73	FALSE			Progressive.11
S44	89	RUL (posterior wall)	TRUE	TRUE	FALSE		FALSE	FALSE	FALSE	Progression	Current	1	F	YES	40	76	FALSE	PD21907c	X52_P
S45	89	RMB	TRUE	TRUE	FALSE		FALSE	FALSE	FALSE	Progression	Current	1	F	YES	40	76	FALSE	PD21907a	X54_P
S46	95	LMB	FALSE	TRUE	TRUE	Illumina	FALSE	TRUE	FALSE	Regression	Former	0	M	NO	5	76	FALSE		X26_R	Regressive.7
S47	96	LUL	TRUE	TRUE	TRUE	Illumina	FALSE	TRUE	TRUE	Regression	Current	0	M	NO	50	64	FALSE	PD21908a	X15_R	Regressive.9
S48	97	RUL	FALSE	TRUE	FALSE		FALSE	FALSE	FALSE	Progression	Unknown	1	F	YES	60	52	FALSE		X27_P
S49	101	Lower trachea	FALSE	TRUE	FALSE		FALSE	FALSE	FALSE	Progression	Current	1	M	NO	44	58	TRUE		X28_P
S50	102	LMB Prox.to LUL	FALSE	FALSE	TRUE	Illumina	FALSE	TRUE	FALSE	Progression	Former	1	M	YES	59	76	FALSE			Progressive.15
S51	102	S/C betw.Lingula & LUL	TRUE	TRUE	TRUE	Illumina	FALSE	TRUE	FALSE	Progression	Former	1	M	YES	59	77	FALSE	PD21883a	X31_P	Progressive.16
S52	102	Carina Betw.LLL & LUL	FALSE	TRUE	FALSE		FALSE	FALSE	FALSE	Progression	Former	1	M	YES	59	76	FALSE		X29_P
S53	102	Proximal LMB	TRUE	TRUE	FALSE		FALSE	TRUE	TRUE	Progression	Former	1	M	YES	59	77	FALSE	PD21883d	X32_P
S54	102	LMB pro. To LUL	FALSE	TRUE	FALSE		FALSE	FALSE	FALSE	Progression	Former	1	M	YES	59	76	FALSE		X30_P
S55	103	Main carina	FALSE	FALSE	TRUE	Illumina	FALSE	TRUE	FALSE	Regression	Former	0	M	NO	70	55	FALSE			Regressive.13
S56	104	LUL stump	TRUE	TRUE	TRUE	Illumina	FALSE	TRUE	TRUE	Regression	Former	0	M	YES	50	71	TRUE	PD21884a	X17_R	Regressive.2		TRUE
S57	104	RUL	TRUE	TRUE	TRUE	Illumina	FALSE	TRUE	TRUE	Regression	Former	0	M	YES	50	73	TRUE	PD21884c	X19_R	Regressive.10
S58	105	RIB Medial wall	TRUE	TRUE	TRUE	Illumina	FALSE	TRUE	FALSE	Regression	Former	0	M	NO	9	67	FALSE	PD21885a	X20_R	Regressive.1
S59	105	RUL	TRUE	TRUE	TRUE	Illumina	FALSE	TRUE	TRUE	Regression	Former	0	M	NO	9	67	FALSE	PD21885c	X21_R	Regressive.14
S60	106	RUL stump	FALSE	FALSE	TRUE	Affymetrix	TRUE	TRUE	FALSE	Regression	Former	0	M		96	84	TRUE			Sample_52 Affy	Regressive.3
S61	108	RLL	FALSE	TRUE	TRUE	Illumina	FALSE	TRUE	FALSE	Regression	Former	0	M	NO	30	67	TRUE		X23_R	Regressive.4		TRUE
S62	109	RUL	TRUE	TRUE	TRUE	Illumina	FALSE	TRUE	FALSE	Progression	Current	1	M	YES	40	58	FALSE	PD21887a	X36_P	Progressive.13
S63	110	LMB	TRUE	TRUE	TRUE	Illumina	FALSE	TRUE	TRUE	Progression	Former	1	F	YES	40	65	FALSE	PD21889a	X37_P	Progressive.12
S64	110	Secondary carina btw LUL/LLL	FALSE	TRUE	FALSE		FALSE	FALSE	FALSE	Progression	Former	1	F	YES	40	65	FALSE		X38_P
S65	110	Main carina	FALSE	FALSE	TRUE	Affymetrix	TRUE	TRUE	FALSE	Progression	Former	1	F	YES	40	67	FALSE			Sample_37 Affy	Progressive.4
S66	111	LLL Ant.bas.seg	FALSE	FALSE	TRUE	Illumina	FALSE	TRUE	FALSE	Progression	Former	1	M	YES	40	60	FALSE			Progressive.4
S67	111	LLL	FALSE	FALSE	TRUE	Affymetrix	TRUE	TRUE	FALSE	Progression	Former	1	M	YES	40	61	FALSE			Sample_35 Affy	Progressive.2
S68	113	Ant.wall of Trachea 2-3cms below cords	FALSE	FALSE	TRUE	Illumina	FALSE	TRUE	FALSE	Progression	Former	1	M	YES	50	75	TRUE			Progressive.10
S69	113	Trachea	TRUE	TRUE	FALSE		FALSE	TRUE	TRUE	Progression	Former	1	M	YES	50	74	TRUE	PD21890a	X53_P
S70	114	RUL	FALSE	TRUE	FALSE		FALSE	FALSE	FALSE	Progression	Former	1	M	NO	90	62	TRUE		X45A_P
S71	115	LMB/anastomosis	FALSE	TRUE	TRUE	Affymetrix	TRUE	TRUE	FALSE	Regression	Former	0	M	NO	30	68	TRUE		X31_R	Sample_51 Affy	Regressive.2
S72	116	RML	FALSE	TRUE	TRUE	Affymetrix	TRUE	TRUE	FALSE	Progression	Former	1	F	YES	75	78	TRUE		X44A_P	Sample_34 Affy	Progressive.1.2
S73	117	Subcarina between RML & RLL	FALSE	FALSE	TRUE	Affymetrix	TRUE	TRUE	FALSE	Regression	Former	0	F	YES	30	64	FALSE			Sample_63 Affy	Regressive.11
S74	118	RML	FALSE	FALSE	TRUE	Affymetrix	TRUE	TRUE	FALSE	Regression	Former	0	M		10	68	TRUE			Sample_59 Affy	Regressive.9.2
S75	119	RUL	TRUE	TRUE	FALSE		FALSE	FALSE	FALSE	Regression	Former	0	M	NO	36	68	FALSE	PD21893a	X29_R			TRUE
S76	119	LUL	FALSE	FALSE	TRUE	Affymetrix	TRUE	TRUE	FALSE	Regression	Former	0	M	NO	36	69	FALSE			Sample_62 Affy	Regressive.10
S77	122	Trachea	TRUE	TRUE	TRUE	Affymetrix	TRUE	TRUE	TRUE	Progression	Former	1	M	YES	70	76	TRUE	PD21895a	X51_P	Sample_41 Affy	Progressive.8
S78	123	RUL	TRUE	TRUE	FALSE		FALSE	TRUE	TRUE	Progression	Former	1	M	YES	60	72	FALSE	PD21896a	X55_P
S79	123	RMB	FALSE	FALSE	TRUE	Affymetrix	TRUE	TRUE	FALSE	Progression	Former	1	M	YES	60	72	FALSE			Sample_36 Affy	Progressive.3
S80	124	RIB	FALSE	FALSE	TRUE	Affymetrix	TRUE	TRUE	FALSE	Progression	Former	1	M	NO	40	82	FALSE			Sample_38 Affy	Progressive.5
S81	126	Ap. Seg. RLL	TRUE	FALSE	TRUE	Affymetrix	TRUE	TRUE	FALSE	Progression	Former	1	M		58	75	TRUE	PD38325a		Sample_39 Affy	Progressive.6
S82	126	RMB (suture line)	FALSE	FALSE	TRUE	Affymetrix	TRUE	TRUE	FALSE	Regression	Former	0	M		58	75	TRUE			Sample_57 Affy	Regressive.5
S83	127	Orifice apical LLL	FALSE	FALSE	TRUE	Affymetrix	TRUE	TRUE	FALSE	Regression	Current	0	M		80	60	FALSE			Sample_58 Affy	Regressive.8
S84	128	Apical RLL	FALSE	FALSE	TRUE	Affymetrix	TRUE	TRUE	FALSE	Progression	Current	1	F	YES	55	56	TRUE			Sample_46 Affy	Progressive.12
S85	128	Apical RLL	FALSE	FALSE	TRUE	Affymetrix	TRUE	TRUE	FALSE	Progression	Current	1	F	YES	55	57	TRUE			Sample_40 Affy	Progressive.7
S86	130	Apical RLL	FALSE	FALSE	TRUE	Affymetrix	TRUE	TRUE	FALSE	Progression	Current	1	F	YES	30	71	TRUE			Sample_42 Affy	Progressive.9
S87	133	RML	FALSE	FALSE	TRUE	Affymetrix	TRUE	TRUE	FALSE	Regression	Never	0	M	NO	0	57	FALSE			Sample_64 Affy	Regressive.12
S88	12	LUL Stump	FALSE	FALSE	FALSE		FALSE	TRUE	FALSE	Progression	Former	1	M	NO	60	55	TRUE
S89	12	Left Pneum. Stump	FALSE	FALSE	FALSE		FALSE	TRUE	FALSE	Progression	Former	1	M	NO	60	61	TRUE
S90	26	RIB	FALSE	FALSE	FALSE		FALSE	TRUE	FALSE	Progression	Current	1	M	YES	40	76	TRUE
S91	26	RIB	FALSE	FALSE	FALSE		FALSE	TRUE	FALSE	Progression	Current	1	M	YES	40	76	TRUE
S92	76	LLL stump	FALSE	FALSE	FALSE		FALSE	TRUE	FALSE	Progression	Former	1	M	NO	60	55	TRUE
S93	76	RLL Ap.Seg	FALSE	FALSE	FALSE		FALSE	TRUE	FALSE	Progression	Former	1	M	NO	60	55	TRUE
S94	76	LLL stump	FALSE	FALSE	FALSE		FALSE	TRUE	FALSE	Progression	Former	1	M	NO	60	55	TRUE
S95	95	RML	FALSE	FALSE	FALSE		FALSE	FALSE	FALSE	Regression	Former	0	M	NO	5	75	FALSE
S96	104	RUL	FALSE	FALSE	FALSE		FALSE	TRUE	FALSE	Regression	Former	0	M	YES	50	71	TRUE
S97	103	LLL	FALSE	FALSE	FALSE		FALSE	TRUE	FALSE	Regression	Former	0	M	NO	70	54	FALSE
S98	88	LLL	FALSE	FALSE	FALSE		FALSE	FALSE	FALSE	Regression	Never	0	M	NO	0	52	FALSE
S99	105	RUL	FALSE	FALSE	FALSE		FALSE	FALSE	FALSE	Regression	Former	0	M	NO	9	67	FALSE
S100	12	LLL	FALSE	TRUE	FALSE		FALSE	FALSE	FALSE	Control	Former	0	M	NO	60	64	TRUE		X12_C
S101	60	RLL Basal segm.	FALSE	TRUE	FALSE		FALSE	FALSE	FALSE	Control	Former	0	M	NO	32	75	TRUE		X60_C
S102	102	MC	FALSE	TRUE	FALSE		FALSE	FALSE	FALSE	Control	Former	0	M	YES	59	77	FALSE		X102_C
S103	104	MC	FALSE	TRUE	FALSE		FALSE	FALSE	FALSE	Control	Former	0	M	YES	50	71	TRUE		X104_C
S104	C1_A	MC	FALSE	TRUE	FALSE		FALSE	FALSE	FALSE	Control	Unknown	0	F		40	67	TRUE		X1A_C
S105	C1_B	RMB	FALSE	TRUE	FALSE		FALSE	FALSE	FALSE	Control	Unknown	0	F		40	67	TRUE		X1B_C
S106	C10	Trachea	FALSE	TRUE	FALSE		FALSE	FALSE	FALSE	Control	Unknown	0	M	YES	60	52	TRUE		X10B_C
S107	C11_A	RLL	FALSE	TRUE	FALSE		FALSE	FALSE	FALSE	Control	Unknown	0	M	YES	65	77	TRUE		X11A_C
S108	C11_B	RMB	FALSE	TRUE	FALSE		FALSE	FALSE	FALSE	Control	Unknown	0	M	YES	65	77	TRUE		X11B_C
S109	C12_A	LMB	FALSE	TRUE	FALSE		FALSE	FALSE	FALSE	Control	Unknown	0	M	YES	30	74	TRUE		X12A_C
S110	C12_B	Lower Anterior Trachea 1/3	FALSE	TRUE	FALSE		FALSE	FALSE	FALSE	Control	Unknown	0	M	YES	30	74	TRUE		X12B_C
S111	C13_A	Proximal LMB	FALSE	TRUE	FALSE		FALSE	FALSE	FALSE	Control	Unknown	0	M	YES	20	66	TRUE		X13A_C
S112	C13_B	Distal LMB	FALSE	TRUE	FALSE		FALSE	FALSE	FALSE	Control	Unknown	0	M	YES	20	66	TRUE		X13B_C
S113	C14	Lower (1/3) Trachea	FALSE	TRUE	FALSE		FALSE	FALSE	FALSE	Control	Unknown	0	M	NO	32	56	TRUE		X14A_C
S114	C15	RMB	FALSE	TRUE	FALSE		FALSE	FALSE	FALSE	Control	Unknown	0	M	YES	50	58	FALSE		X15B_C
S115	C16_A	Lower Trachea	FALSE	TRUE	FALSE		FALSE	FALSE	FALSE	Control	Unknown	0	M	YES	36	61	FALSE		X16A_C
S116	C16_B	LMB	FALSE	TRUE	FALSE		FALSE	FALSE	FALSE	Control	Unknown	0	M	YES	36	61	FALSE		X16B_C
S117	C17_A	Trachea	FALSE	TRUE	FALSE		FALSE	FALSE	FALSE	Control	Unknown	0	F	YES		77	TRUE		X17A_C
S118	C17_B	RMB	FALSE	TRUE	FALSE		FALSE	FALSE	FALSE	Control	Unknown	0	F	YES		77	TRUE		X17B_C
S119	C2_A	LMB	FALSE	TRUE	FALSE		FALSE	FALSE	FALSE	Control	Unknown	0	M	YES	30	50	FALSE		X2A_C
S120	C2_B	Distal Trachea	FALSE	TRUE	FALSE		FALSE	FALSE	FALSE	Control	Unknown	0	M	YES	30	50	FALSE		X2B_C
S121	C3	RMB	FALSE	TRUE	FALSE		FALSE	FALSE	FALSE	Control	Unknown	0	M	YES		73	FALSE		X3A_C
S122	C4_A	RMB	FALSE	TRUE	FALSE		FALSE	FALSE	FALSE	Control	Unknown	0	M	YES	30	65	FALSE		X4A_C
S123	C4_B	LMB	FALSE	TRUE	FALSE		FALSE	FALSE	FALSE	Control	Unknown	0	M	YES	30	65	FALSE		X4B_C
S124	C5_A	LMB	FALSE	TRUE	FALSE		FALSE	FALSE	FALSE	Control	Unknown	0	M	YES	40	68	TRUE		X5A_C
S125	C5_B	Trachea	FALSE	TRUE	FALSE		FALSE	FALSE	FALSE	Control	Unknown	0	M	YES	40	68	TRUE		X5B_C
S126	C6_A	LMB	FALSE	TRUE	FALSE		FALSE	FALSE	FALSE	Control	Unknown	0	M	YES	30	68	TRUE		X6A_C
S127	C6_B	Low Trac (1/3 anterior wall)	FALSE	TRUE	FALSE		FALSE	FALSE	FALSE	Control	Unknown	0	M	YES	30	68	TRUE		X6B_C
S128	C7_A	Proximal RMB	FALSE	TRUE	FALSE		FALSE	FALSE	FALSE	Control	Unknown	0	M	YES		57	FALSE		X7A_C
S129	C7_B	Trachea	FALSE	TRUE	FALSE		FALSE	FALSE	FALSE	Control	Unknown	0	M	YES		57	FALSE		X7B_C
S130	C8_A	RMB Anterior wall	FALSE	TRUE	FALSE		FALSE	FALSE	FALSE	Control	Unknown	0	M	YES	60	65	FALSE		X8A_C
S131	C8_B	LMB medial wall	FALSE	TRUE	FALSE		FALSE	FALSE	FALSE	Control	Unknown	0	M	YES	60	65	FALSE		X8B_C
S132	C9	RIB	FALSE	TRUE	FALSE		FALSE	FALSE	FALSE	Control	Unknown	0	M	YES	40	44	FALSE		X9A_C
S133	6	RLL APICAL	TRUE	FALSE	FALSE		FALSE	TRUE	FALSE	Regression	Former	0	M	NO	141	71	FALSE	PD38317a
S134	103	RML/RLL/CAR	TRUE	FALSE	FALSE		FALSE	TRUE	FALSE	Regression	Former	0	M	NO	70	57	FALSE	PD38319a
S135	108	ORIFICE RML/RLL	TRUE	FALSE	FALSE		FALSE	TRUE	FALSE	Progression	Former	1	M	NO	30	69	TRUE	PD38320a
S136	111	LLL	TRUE	FALSE	FALSE		FALSE	FALSE	FALSE	Progression	Former	1	M	YES	40	59	FALSE	PD38321a
S137	111	LLL BAS SEG	TRUE	FALSE	FALSE		FALSE	TRUE	FALSE	Progression	Former	1	M	YES	40	61	FALSE	PD38322a
S138	114	RUL stump	TRUE	FALSE	FALSE		FALSE	TRUE	FALSE	Progression	Former	1	M	NO	90	62	TRUE	PD38321c
S139	124	RUL	TRUE	FALSE	FALSE		FALSE	FALSE	FALSE	Progression	Former	1	M	NO	40	81	FALSE	PD38323a
S140	132	RUL ORIFICE	TRUE	FALSE	FALSE		FALSE	TRUE	TRUE	Regression	Former	0	M	YES	55	70	FALSE	PD38326a				TRUE
S141	142	RLL BAS SEG	TRUE	FALSE	FALSE		FALSE	FALSE	FALSE	Progression	Former	1	F	NO	60	69	FALSE	PD38327a
S142	89	RUL (posterior wall)	FALSE	FALSE	FALSE		FALSE	TRUE	FALSE	Progression	Current	1	F	YES	40	67	FALSE
S143	104	LUL stump	FALSE	FALSE	FALSE		FALSE	TRUE	TRUE	Regression	Former	0	M	YES	50	71	TRUE					TRUE
S144	108	RML orifice	FALSE	FALSE	FALSE		FALSE	TRUE	FALSE	Regression	Former	0	M	NO	30	68	TRUE					TRUE
S145	109	Central Spur RUL	FALSE	FALSE	FALSE		FALSE	TRUE	FALSE	Progression	Current	1	M	YES	40	56	FALSE
S146	111	RML (carina of RML&RLL)	FALSE	FALSE	FALSE		FALSE	TRUE	FALSE	Regression	Former	0	M	YES	40	60	FALSE
S147	131	LUL LOB STUMP	FALSE	FALSE	FALSE		FALSE	TRUE	TRUE	Regression	Former	0	F	YES	27	63	TRUE
S148	132	RMB ANT WALL	FALSE	FALSE	FALSE		FALSE	TRUE	TRUE	Progression	Former	1	M	YES	55	69	FALSE
S149	132	RIB	FALSE	FALSE	FALSE		FALSE	TRUE	TRUE	Regression	Former	0	M	YES	55	70	FALSE					TRUE
S150	142	RLL BAS SEG	FALSE	FALSE	FALSE		FALSE	TRUE	TRUE	Progression	Former	1	F	NO	60	68	FALSE
S151	144	LLL	FALSE	FALSE	FALSE		FALSE	TRUE	FALSE	Regression	Never	0	F	YES	0	74	FALSE
S152	134	RMB ORIF	FALSE	FALSE	FALSE		FALSE	TRUE	TRUE	Progression	Former	1	M	YES	43	81	TRUE
S153	136	PNEUM STUMP	FALSE	FALSE	FALSE		FALSE	TRUE	FALSE	Progression	Current	1	M	YES		63	TRUE
S154	139	LLL	FALSE	FALSE	FALSE		FALSE	TRUE	FALSE	Progression	Current	1	M	YES	50	68	FALSE
S156	132	RUL CARINA	FALSE	FALSE	FALSE		FALSE	TRUE	TRUE	Progression	Former	1	M	YES	55	69	FALSE
S157	134	RMB	FALSE	FALSE	FALSE		FALSE	TRUE	TRUE	Progression	Former	1	M	YES	43	81	TRUE
S158	136	PNEUM STUMP	FALSE	FALSE	FALSE		FALSE	TRUE	TRUE	Progression	Current	1	M	YES		65	TRUE
S159	136	PNEUM STUMP	FALSE	FALSE	FALSE		FALSE	TRUE	TRUE	Progression	Current	1	M	YES		63	TRUE
S160	139	LLL	FALSE	FALSE	FALSE		FALSE	TRUE	TRUE	Progression	Current	1	M	YES	50	68	FALSE
S161	140	RUL APIC	FALSE	FALSE	FALSE		FALSE	TRUE	TRUE	Progression	Former	1	M	YES	30	75	FALSE
S162	142	RLL BAS SEG	FALSE	FALSE	FALSE		FALSE	TRUE	TRUE	Progression	Former	1	F	NO	60	68	FALSE
S163	125	MC	FALSE	FALSE	FALSE		FALSE	TRUE	TRUE	Regression	Current	0	M	NO	45	51	FALSE
S164	132	RUL ORIFICE	FALSE	FALSE	FALSE		FALSE	TRUE	TRUE	Regression	Former	0	M	YES	55	69	FALSE					TRUE
S165	132	RUL ORIFICE	FALSE	FALSE	FALSE		FALSE	TRUE	TRUE	Regression	Former	0	M	YES	55	69	FALSE					TRUE
S166	135	ORIF RUL MED WALL	FALSE	FALSE	FALSE		FALSE	TRUE	TRUE	Regression	Current	0	F	YES	40	51	TRUE
S167	138	LLL APICAL	FALSE	FALSE	FALSE		FALSE	TRUE	TRUE	Regression	Former	0	F	YES	50	74	TRUE					TRUE
S168	141	RUL	FALSE	FALSE	FALSE		FALSE	TRUE	TRUE	Regression	Former	0	M	YES	35	64	FALSE
S169	144	LLL	FALSE	FALSE	FALSE		FALSE	TRUE	TRUE	Regression	Never	0	F	YES	0	74	FALSE
S170	102	S/C betw.LUL & LLL	FALSE	FALSE	FALSE		FALSE	TRUE	TRUE	Progression	Former	1	M	YES	59	69	FALSE
