# Supplementary material for: Immune Surveillance in Clinical Regression of Preinvasive Squamous Cell Lung Cancer
Source: Oxford University Press journal article supplement (doi:10.1158/2159-8290.cd-19-1366), 2020-07-20
Supplement: 21598290cd191366-sup-232797_2_supp_6389496_qc2q2g.xlsx [file 21598290cd191366-sup-232797_2_supp_6389496_qc2q2g.xlsx]

## Sheet: CIS Danaher GXN
SampleID	B.cells	Cytotoxic.cells	DC	Exhausted.CD8	Mast.cells	Neutrophils	NK.CD56dim.cells	NK.cells	Th1.cells	CD8.T.cells	til.score	patient	Outcome
S60	1.94136	2.38687	1.25624	2.04581	2.52768	1.8566	1.58313	2.60703	4.17706	3.15415	2.31792	106	Regression
S65	1.85628	2.18779	1.21647	1.7021	1.97476	1.70627	1.59034	2.1759	2.03503	2.76069	1.91115	110	Progression
S67	1.92316	1.93239	1.7931	1.84886	2.38425	1.77428	1.23405	2.01347	2.12646	3.0148	2.05022	111	Progression
S71	2.32698	2.20311	1.29923	2.55421	2.5296	1.72597	1.95063	2.45191	3.12904	3.01325	2.25421	115	Regression
S72	1.8896	1.92856	1.32819	1.76836	2.26412	1.89372	0.892139	2.03214	2.27381	2.97229	2.00175	116	Progression
S73	2.09061	2.13259	1.60215	1.89023	2.67775	2.0633	2.13598	2.34959	2.5961	3.94721	2.20499	117	Regression
S74	1.84196	2.20022	1.37441	2.0078	2.56711	1.74443	1.15393	2.73023	2.21368	3.35388	1.98344	118	Regression
S76	2.30777	2.16556	1.49682	1.76524	2.74806	1.75799	2.43386	2.41359	2.75815	3.76184	2.30731	119	Regression
S77	2.00409	2.14116	1.72649	1.80693	2.20407	1.70268	1.5023	2.73321	2.71003	3.72147	2.17152	122	Progression
S79	1.82113	2.02261	1.32134	1.74687	2.28244	1.77611	1.85467	1.85225	2.63675	3.02643	2.05882	123	Progression
S80	1.68579	1.85038	1.48371	1.56091	2.08668	1.6147	1.40654	1.96017	2.25895	2.80906	1.88912	124	Progression
S81	2.22177	2.04056	1.22338	1.95544	2.26703	1.63535	1.38994	2.30694	2.1328	3.35247	2.06678	126	Progression
S82	2.16834	2.16735	1.16388	2.10293	2.34996	1.92641	2.42976	2.39334	2.80871	3.41341	2.2638	126	Regression
S83	2.21997	2.28161	1.31328	1.98401	2.6918	1.82755	1.84903	2.31758	2.4948	2.85569	2.13514	127	Regression
S84	2.16613	2.12639	1.28428	2.26685	2.26564	1.89128	1.89338	2.61695	2.85216	3.29091	2.27443	128	Progression
S85	2.03724	2.08486	1.61559	1.7174	2.20339	1.9558	1.28819	2.19999	2.17126	2.95141	2.07179	128	Progression
S86	1.86488	1.88598	1.38264	1.60119	2.25705	1.73391	1.00906	2.01432	2.44743	3.35259	1.98441	130	Progression
S87	2.10489	2.32048	1.1732	1.77923	2.46594	1.71019	1.82208	2.28707	2.70986	3.27754	2.16043	133	Regression
mean.p	1.94701	2.02007	1.43752	1.79749	2.21894	1.76841	1.40606	2.19053	2.36447	3.12521	2.048
mean.r	2.12524	2.23222	1.3349	2.01618	2.56974	1.82655	1.9198	2.44379	2.86093	3.34712	2.20341
p.PvR	0.032	0.051	0.24	0.042	4.7e-06	0.17	0.0065	0.029	0.023	0.15	0.0046
FDR.PvR	0.203	0.21	0.45	0.21	5.17e-05	0.45	0.0585	0.203	0.184	0.45	0.046

## Sheet: CIS MethylCIBERSORT
SampleID	Cancer	CD14	CD19	CD4_Eff	CD56	CD8	Endothelial	Eos	Fibroblast	Neu	Treg	PC.immune	patient	Outcome
S15	0.700754	0.0157931	0.0256118	0	0.00581268	0.0422736	0.0542114	0	0.0486627	0.0768359	0.0300447	0.196372	12	Progressive
S12	0.663189	0.00492369	0.0519778	0	0.0127916	0.0574994	0.0529714	0.0102369	0.051512	0.0364653	0.058433	0.232328	12	Progressive
S14	0.73969	0	0.0436923	0	0.0150338	0.0122864	0.040657	0	0.0411789	0.0556651	0.0517967	0.178474	12	Progressive
S20	0.632037	0.0113455	0.0451398	0	0.0486764	0.0479754	0.0512544	0	0.0737984	0.0299332	0.0598403	0.242911	17	Progressive
S23	0.493822	0.0028471	0.0272544	0	0.0753037	0	0.0871874	0	0.0940537	0.121673	0.0978593	0.324937	26	Progressive
S36	0.527879	0	0.0424369	0.0070136	0.0629274	0.0348847	0.0898434	0.0128704	0.123736	0.0423983	0.0560107	0.258542	73	Regressive
S42	0.727364	0	0.0384803	0.0273677	0.0336094	0	0.0327382	0	0.051278	0.0635068	0.0256558	0.18862	87	Progressive
S51	0.571926	0.00217108	0.0459785	0.0511824	0.0700124	0	0.064731	0	0.0772712	0.0871923	0.0295347	0.286071	102	Progressive
S62	0.504966	0.00310914	0.104334	0.032379	0.0637361	0.0121606	0.0494611	0	0.0658969	0.0932977	0.0706592	0.379675	109	Progressive
S9	0.722263	0.00591946	0.0259162	0.0376234	0.0185951	0.0336259	0.0353316	0	0.0543769	0.057646	0.00870272	0.188029	11	Progressive
S11	0.703758	0.0204762	0.0456066	0.0030938	0.0273725	0.0306778	0.0504009	0.00397658	0.0546434	0.0135982	0.0463962	0.191198	12	Progressive
S10	0.446649	0.0152632	0.153159	0	0.0328196	0.0180985	0.0424389	0	0.0635242	0.12693	0.101118	0.447388	12	Progressive
S22	0.510639	0.00797738	0.027958	0.0403168	0.0886885	0	0.0612034	0	0.0740947	0.107024	0.082098	0.354063	26	Progressive
S29	0.710883	0	0.0255139	0.0195608	0.0308267	0.0140478	0.0566555	0	0.0570181	0.0538955	0.031599	0.175444	60	Progressive
S35	0.503841	0	0.0430424	0.0561043	0.0641169	0	0.11424	0.00687156	0.133724	0.0632836	0.0147765	0.248195	73	Regressive
S39	0.722676	0.00315139	0.01447	0	0	0.076121	0.0533224	0	0.0724668	0.0216577	0.0361348	0.151535	77	Progressive
S58	0.388705	0	0.105063	0.0438344	0.0975113	0	0.102028	0	0.130077	0.090259	0.0425213	0.379189	105	Regressive
S63	0.572639	0.0465073	0.0202141	0	0.0479449	0	0.0842833	0	0.103441	0.0873234	0.0376468	0.239637	110	Progressive
S6	0.697427	0	0.0283463	0.0130737	0.0619469	0	0.0408696	0.00719557	0.0494932	0.0523238	0.0493239	0.21221	6	Progressive
S17	0.760199	0	0.0371647	0	0	0.0829165	0.0274527	0	0.0373394	0.0309914	0.0239362	0.175009	12	Progressive
S16	0.702892	0.0108875	0.0415085	0	0	0.0471524	0.0558023	0	0.0358716	0.0466271	0.0592584	0.205434	12	Progressive
S32	0.456196	0	0.0436832	0.0842931	0.0177975	0.132323	0.0832816	0	0.116275	0.0661512	0	0.344248	64	Regressive
S34	0.502425	0	0.0494318	0.0439355	0.0724416	0.0139617	0.0967484	0	0.132272	0.0644884	0.024296	0.268555	73	Regressive
S48	0.459197	0	0.0454143	0.0225527	0.0184726	0.00528952	0.152033	0	0.111272	0.120045	0.0657236	0.277497	97	Progressive
S52	0.498933	0.0181815	0.0394922	0.0300577	0.0936677	0	0.0671521	0	0.0984707	0.0976467	0.0563982	0.335444	102	Progressive
S53	0.623418	0	0.0421781	0.0189468	0.0766722	0	0.0565163	0	0.0661965	0.0581634	0.0579088	0.253869	102	Progressive
S59	0.500944	0	0.0436277	0.108401	0.0601176	0	0.0745036	0	0.100453	0.111953	0	0.3241	105	Regressive
S64	0.556724	0.0283837	0.0273302	0.00729875	0.0440719	0	0.05568	0	0.0645236	0.186301	0.0296868	0.323073	110	Progressive
S13	0.795758	0.000748032	0.0127425	0.0192093	0	0.0575266	0.0261284	0	0.0326161	0.0467541	0.00851707	0.145498	12	Progressive
S18	0.531707	0.0276661	0.114494	0	0.0661656	0	0.0542736	0	0.0577598	0.0781195	0.0698145	0.35626	12	Progressive
S100	0.502012	0	0.0377718	0.0400016	0.0794456	0	0.0829928	0.006764	0.0927481	0.0874637	0.0708004	0.322247	12	Control
S101	0.376611	0	0.0806136	0.0631661	0.0749409	0.0123299	0.0998715	0	0.12566	0.119995	0.0468113	0.397857	60	Control
S31	0.533374	0.0107748	0.0817487	0.0052553	0.0489533	0.0015215	0.0557433	0	0.0784488	0.111613	0.0725667	0.332433	63	Progressive
S33	0.523799	0	0.0300821	0.127733	0.0702725	0.0142244	0.0794418	0	0.0896676	0.0647794	0	0.307091	64	Regressive
S54	0.538072	0	0.04968	0.0536011	0.0815226	0	0.078054	0	0.0888215	0.0786872	0.0315618	0.295053	102	Progressive
S102	0.601225	0	0.0325643	0.0608919	0.047999	0.000143619	0.0797949	0	0.0879834	0.0893974	0	0.230996	102	Control
S103	0.483834	0	0.0586462	0.0395317	0.070956	0.00860251	0.0814725	0	0.13119	0.0743102	0.0514568	0.303503	104	Control
S30	0.473181	0	0.0280874	0.0197004	0.093286	0	0.0938555	0	0.111241	0.115691	0.0649575	0.321722	61	Regressive
S46	0.371031	0.0126301	0.121748	0.070435	0.0753334	0.0308404	0.0922336	0.0172315	0.12313	0.0440682	0.0413184	0.413605	95	Regressive
S106	0.541041	0	0.049643	0.0300433	0.0733923	0.0125624	0.0696658	0.00848741	0.0976444	0.0501712	0.0673491	0.291649	10	Control
S107	0.571752	0	0.0388813	0.099771	0.0761955	0	0.0624299	0.0076776	0.0762097	0.0670828	0	0.289608	11	Control
S108	0.582227	0	0.0363373	0.0570141	0.0819215	0	0.0587519	0	0.0689703	0.112175	0.0026023	0.290051	11	Control
S109	0.560463	0	0.0455822	0.0470156	0.0605463	0.0130004	0.0674512	0	0.112749	0.0700929	0.0231002	0.259337	12	Control
S110	0.611739	0	0.0532469	0.059199	0.0353914	0	0.0810108	0.0128937	0.106403	0.040116	0	0.200847	12	Control
S112	0.498209	0	0.0379489	0.0478288	0.108777	0	0.0719691	0	0.0939971	0.0903533	0.0509167	0.335825	13	Control
S128	0.512712	0	0.0449841	0.125817	0.0686207	0	0.0789795	0.00700439	0.103525	0.0583568	0	0.304783	7	Control
S130	0.471982	0.00142799	0.0387151	0.0605217	0.0845699	0	0.0755051	0.00202515	0.0911353	0.124388	0.0497293	0.361377	8	Control
S132	0.421817	0.00847339	0.0455614	0.0908877	0.0799863	0.094447	0.0824801	0.0220786	0.0968572	0.0574109	0	0.398845	9	Control
S105	0.477471	0	0.0277346	0.080842	0.115509	0	0.0759015	0	0.0897078	0.126392	0.00644167	0.35692	1	Control
S119	0.405068	0	0.0572355	0	0.0680867	0.0903676	0.0752186	0.0143618	0.0962113	0.0982791	0.0951719	0.423502	2	Control
S120	0.35988	0	0.0720162	0	0.0746833	0.130455	0.0722024	0.0177045	0.0908234	0.069302	0.112933	0.477094	2	Control
S121	0.602157	0	0.0309472	0.049143	0.0685573	0	0.0719268	0.00884575	0.0995905	0.0467073	0.022125	0.226326	3	Control
S122	0.55349	0	0.0376409	0.0737778	0.0778908	0	0.0689674	0	0.0950826	0.0728656	0.0202848	0.28246	4	Control
S124	0.622177	0.00738839	0.0370814	0.0932727	0.0595069	0	0.0800381	0.0214408	0.0787566	0.00033762	0	0.219028	5	Control
S125	0.566964	0	0.0454895	0.099694	0.0662404	0	0.0769808	0.00495952	0.0982061	0.0414659	0	0.257849	5	Control
S126	0.52808	0	0.0356203	0.139145	0.0586243	0	0.079408	0.00874505	0.0922195	0.0581585	0	0.300293	6	Control
S127	0.558774	0	0.0414669	0.0789492	0.0587892	0	0.0770815	0	0.106382	0.0655476	0.0130095	0.257762	6	Control
S56	0.624686	0	0.0655451	0	0.035055	0.0409114	0.0371956	0.00173937	0.0524204	0.0525079	0.089939	0.285698	104	Regressive
S57	0.365472	0	0.0463483	0.018274	0.100732	0	0.130381	0	0.170202	0.0969253	0.0716652	0.333945	104	Regressive
S27	0.60377	0	0.0310519	0.00925916	0.0597485	0	0.0717292	0	0.093305	0.0724486	0.0586875	0.231196	56	Progressive
S37	0.646183	0	0.0305105	0	0	0.0420225	0.0645777	0	0.0787619	0.0802531	0.0576914	0.210477	76	Progressive
S47	0.590762	0.0143723	0.0672868	0.0178822	0.0563402	0.0451614	0.0417682	0	0.0591825	0.0624809	0.0447634	0.308287	96	Regressive
S5	0.391456	0.0332059	0.093107	0.0137361	0.0668744	0.0600612	0.0736662	0.0210771	0.119365	0.0435323	0.0839189	0.415513	6	Regressive
S49	0.721792	0	0.064942	0	0.0104261	0.0339906	0.033112	0	0.0402845	0.0496274	0.0458249	0.204811	101	Progressive
S21	0.501526	0	0.0453386	0.106781	0.0467212	0.00452853	0.0986484	0	0.10612	0.0903364	0	0.293706	25	Regressive
S28	0.692229	0	0.0219618	0.00719741	0.0332103	0.0078225	0.0851397	0	0.0757562	0.0478314	0.0288522	0.146876	58	Regressive
S61	0.420957	0	0.0942006	0.055016	0.0768822	0	0.106427	0.000760534	0.129515	0.0753615	0.0408802	0.343101	108	Regressive
S70	0.669266	0.00290424	0.0206451	0	0.0613393	0	0.0462646	0	0.0618408	0.0548269	0.0829135	0.222629	114	Progressive
S75	0.623619	0	0.0378825	0	0	0.0810268	0.0663708	0	0.0813484	0.057332	0.0524201	0.228661	119	Regressive
S72	0.766709	0	0.020064	0	0	0.017168	0.0561833	0.0180609	0.0430201	0.0195988	0.0591956	0.134087	116	Progressive
S111	0.522684	0	0.0350062	0.0736312	0.0914549	0.00440007	0.0860627	0	0.0932085	0.0845645	0.00898775	0.298045	13	Control
S131	0.441499	0.0129382	0.0322075	0.0675852	0.0899851	0	0.0844553	0.006629	0.0980367	0.107733	0.0589305	0.376009	8	Control
S104	0.536732	0.0058871	0.00570978	0.0484507	0.0690742	0	0.0540857	0	0.0684297	0.181245	0.0303857	0.340753	1	Control
S123	0.508849	0.00122068	0.0430458	0.0632889	0.0582388	0.0159476	0.0760413	0	0.0894396	0.110208	0.0337196	0.32567	4	Control
S129	0.492168	0	0.038366	0.120888	0.0533443	0	0.0807752	0	0.121361	0.0930972	0	0.305695	7	Control
S44	0.541606	0.0443223	0.0705638	0.0105613	0.059427	0.0235391	0.0557795	0	0.0703521	0.0717409	0.0521075	0.332262	89	Progressive
S45	0.563331	0	0.0488235	0.0344072	0.0542349	0	0.0745056	0	0.0866348	0.0824767	0.0555864	0.275529	89	Progressive
S69	0.610728	0.0326867	0.0121064	0.047733	0.0589143	0	0.0195791	0	0.0532403	0.149934	0.0150783	0.316453	113	Progressive
S71	0.444251	0	0.0461941	0	0.0762302	0	0.103401	0	0.122491	0.118828	0.0886047	0.329857	115	Regressive
S77	0.547586	0	0.110438	0.0562822	0.0549244	0.0148329	0.0723651	0.0129173	0.0845574	0.0288607	0.0172357	0.295491	122	Progressive
S78	0.697784	0.00756889	0.0350354	0	0.00567224	0.0471547	0.081948	0	0.0861655	0.00849557	0.0301754	0.134102	123	Progressive
S113	0.580497	0	0.0402031	0.0740862	0.0360646	0.0313534	0.0868052	0	0.0809414	0.0700493	0	0.251757	14	Control
S114	0.607765	0	0.0309171	0.072216	0.0453147	0	0.0728032	0	0.0885483	0.0823591	7.69127e-05	0.230884	15	Control
S115	0.533967	0	0.0355974	0.0782451	0.0667308	0.0439429	0.0774877	0.00098329	0.0928007	0.070245	0	0.295744	16	Control
S116	0.541675	0	0.0370473	0.0491651	0.0665415	0.0355539	0.0729206	0.0211792	0.0918955	0.0557151	0.0283072	0.293509	16	Control
S117	0.571184	0	0.0318398	0.0435461	0.0744544	0	0.0704615	0.0174462	0.0737523	0.0936444	0.0236708	0.284602	17	Control
S118	0.51296	0	0.0217064	0.0903731	0.0778762	0	0.0742999	0	0.0829341	0.127344	0.0125068	0.329806	17	Control
mean.p	0.624714	0.00898912	0.0460997	0.0149934	0.0396495	0.0199411	0.0572944	0.0014552	0.0667276	0.0710605	0.0490753	0.251264
mean.r	0.494609	0.00334491	0.0569482	0.0433521	0.0614361	0.0258748	0.0871764	0.00336391	0.109832	0.0726782	0.0413847	0.308383
p.PvR	5.8e-05	0.09	0.21	0.014	0.032	0.33	0.00033	0.17	9.8e-07	0.91	0.53	0.0081
FDR.PvR	0.000638	0.54	0.85	0.112	0.224	0.99	0.0033	0.85	1.176e-05	1	1	0.0729

## Sheet: CIS mIHC
sampleID	All CD45	All T cells	B cells	CD4 T cells	CD8 Exhausted T cells	CD8 late effector T cells	CD8 T cells	Cytotoxic T cells	Dendritic Cells	Macrophages	Neutrophils	Treg	prop.cd8.grzb	prop.cd8.eomes
S134	0.0888672	0.0432129	0.0101318	0.0257568	0.0057373	0.00842285	0.0174561	0.00769043	0.00500488	0	0.00109863	0.00195312	0.440559	47.4825
S20	0.0506035	0.0306407	0.000464253	0.0143918	0.0153203	0.000928505	0.0162488	0.0148561	0.0102136	0.00185701	0.000928505	0.00649954	0.914286	33.0571
S143	0.0462149	0.0127587	0.00255174	0.00567054	0.00510349	0.00170116	0.00708818	0.00255174	0.0062376	0	0.00113411	0.00141764	0.36	18.24
S57	0.108724	0.078125	0.0117188	0.0410156	0.0221354	0.0143229	0.0371094	0.015625	0.00455729	0	0.00195312	0.00130208	0.421053	34.386
S137	0.0522181	0.0199722	0.006405	0.0119265	0.00388086	0.00400707	0.00804569	0.00195621	0.0138828	0.0035969	0.00394396	0.00318672	0.243137	123.498
S138	0.120717	0.0238653	0.00417277	0.0144217	0.00387994	0.00527086	0.00944363	0.00139092	0.00409956	0.000292826	0.042899	0.00497804	0.147287	53.5581
S149	0.111189	0.0458832	0.0112597	0.021323	0.0244194	0.000140746	0.0245602	0.0232935	0.0109078	0.00351865	0.00387051	0.00577058	0.948424	347.006
S150	0.0678726	0.0221088	0.000773036	0.0115955	0.00680272	0.00340136	0.0105133	0.00108225	0.000927644	0.000154607	0.000927644	0.00247372	0.102941	44.3235
S151	0.113357	0.0351767	0.00731057	0.0118689	0.0186635	0.00455836	0.0233078	0.00498839	0.000430034	0.00223617	0.0286402	0.00266621	0.214022	217.196
S18	0.00902445	0.0010281	0.000799634	0.000228467	0.000228467	0.000456934	0.000799634	0.000114233	0	0	0	0	0.142857	2.57143
S39	0.0198177	0.00612079	0.00346702	0.00517913	0.000727646	0.000214014	0.00094166	0.000513633	4.28027e-05	0.000128408	0.00094166	0.00179771	0.545455	17.2273
S78	0.041256	0.00667727	0	0.00325914	0.00278219	0.00063593	0.00341812	0.000397456	0.000238474	0.000158983	0.000556439	0.00111288	0.116279	35.186
S86	0.134137	0.0235494	0.0113979	0.015731	0.00461567	0.00207234	0.00781839	0.000659382	0.00405049	0.000188395	0.00631123	0.00574604	0.0843373	49.2651
S148	0.132031	0.0735567	0.000618123	0.0379528	0.0291754	0.00296699	0.0356039	0.00234887	0.00234887	0.000618123	0.00717023	0.00976635	0.0659722	236.083
S140	0.0538303	0.0249661	0.001971	0.0143226	0.00569401	0.001314	0.0106434	0.000262801	0.00236521	0.0014016	0.000876002	0.00319741	0.0246914	130.123
S152	0.0722549	0.0271971	0.0117719	0.0176578	0.00832149	0.00060889	0.00953927	0.0038563	0.00284149	0.000405927	0.00426223	0.00202963	0.404255	41.0638
S154	0.0375552	0.0140832	0.00140832	0.0105154	0.00140832	0.000281664	0.00356774	0.000187776	9.38879e-05	0.000281664	9.38879e-05	0.00197165	0.0526316	15.0789
S133	0.0542663	0.0282042	0.00214209	0.0149946	0.000357015	0	0.0132096	0	0.00142806	0.000714031	0.00214209	0	0	1
S9	0.10778	0.0397083	0.012966	0.0299838	0.0089141	0.000810373	0.00972447	0.00162075	0.00648298	0.012966	0.00324149	0.00243112	0.166667	11.0833
S23	0	0	0	0	0	0	0	0	0	0	0	0	NaN	NaN
S27	0.00615983	0.00243151	0	0.000324202	0.00194521	0.000162101	0.00210731	0.00145891	0	0.000162101	0	0	0.692308	12.0769
S142	0.0849934	0.0381806	0.000332005	0.0182603	0.00298805	0	0.0199203	0.00332005	0.0106242	0.000332005	0.000332005	0.00697211	0.166667	9
S51	0.0560748	0.0170853	0.00569509	0.00788551	0.00379673	0.000584112	0.00919977	0	0.00189836	0.00073014	0.00584112	0.00233645	0	26.0635
S56	0.145549	0.036592	0.0229383	0.0141999	0.0021846	0.00191152	0.0223921	0.00245767	0.00163845	0.0043692	0.00136537	0.00245767	0.109756	8.08537
S144	0.107335	0.00719166	0.00665228	0.00503416	0.00107875	0.000359583	0.0021575	0	0.00719166	0.000359583	0.00341604	0.00107875	0	6.16667
S135	0.0178109	0.00420984	0.000971503	0.00129534	0.000323834	0.00226684	0.00291451	0	0	0	0	0.000971503	0	1.77778
S145	0.166008	0.0158103	0.0202569	0.00839921	0.00148221	0.00247036	0.00741107	0	0.0118577	0.000494071	0.0607708	0.00148221	0	3.33333
S146	0.114401	0.0154778	0.00807537	0.0100942	0.00336474	0.000672948	0.00538358	0.0013459	0.013459	0.00269179	0.00201884	0.0013459	0.25	5.125
p	0.18	0.054	0.12	0.18	0.25	0.071	0.017	0.039	0.52	0.79	0.53	0.12	0.63	0.18

## Sheet: Stroma Danaher GXN
sampleID	B.cells	Cytotoxic.cells	DC	Exhausted.CD8	Mast.cells	Neutrophils	NK.CD56dim.cells	NK.cells	Th1.cells	CD8.T.cells	til.score	patient	Outcome
S60	1.71303	1.80224	1.11099	1.9381	2.54495	1.73544	1.24469	1.43962	2.03252	2.88145	1.86578	106	Regression
S65	1.84909	2.04229	1.53188	1.79312	2.10861	1.38601	0.851956	2.54043	1.8673	3.22217	2.03262	110	Progression
S67	2.23402	2.13091	1.46511	2.11972	2.47673	1.40972	1.30339	3.75004	1.41765	2.90206	2.27017	111	Progression
S71	1.61018	1.92437	1.13414	1.38002	2.24397	1.49545	1.22186	1.91386	1.99374	2.94533	1.90472	115	Regression
S72	1.98844	1.90129	1.88799	2.0968	2.51525	1.71855	1.57764	2.07503	2.09776	3.07695	2.08178	116	Progression
S73	1.71981	2.21639	1.03039	1.78969	2.08656	1.69294	1.61033	1.78572	1.86346	2.68265	1.95334	117	Regression
S74	1.88102	1.9986	1.74263	1.69729	2.29774	1.7219	1.41985	1.88674	2.68565	3.02593	2.05031	118	Regression
S76	2.10567	2.13993	1.03769	1.84862	2.58494	1.86133	1.42077	1.71697	1.19512	3.08876	1.92215	119	Regression
S77	1.9547	1.89089	1.09403	1.89968	2.50767	1.78485	1.55668	2.28264	2.58322	2.84667	2.13213	122	Progression
S79	1.69817	1.93071	1.33373	1.18512	2.50134	1.63576	1.89777	1.87967	2.67629	2.55546	1.95715	123	Progression
S80	2.29345	1.92904	2.10712	1.62163	4.09244	2.72149	0.65202	1.76213	2.03619	2.6247	2.12405	124	Progression
S81	1.76588	1.78784	1.02176	1.53812	2.28052	1.63906	1.65812	1.71191	2.19803	2.97198	1.88891	126	Progression
S82	1.72987	1.95704	1.35736	1.32955	2.07388	1.37739	1.09322	1.84987	1.44711	3.14216	1.73636	126	Regression
S83	1.60619	1.69861	1.39925	1.53892	2.40958	1.30224	1.5023	2.41499	1.84354	2.67431	1.88295	127	Regression
S84	1.72387	2.05718	1.74209	1.86823	1.85549	1.75887	1.22368	1.74999	1.16926	1.86415	1.86858	128	Progression
S85	1.89007	2.07417	1.49912	1.87901	2.36561	1.63796	1.88711	2.27716	2.14736	2.82438	2.07622	128	Progression
S86	1.54824	1.88289	1.49609	1.56653	2.42911	1.61533	1.59215	1.70113	2.12995	2.46674	1.8361	130	Progression
S87	1.94809	1.93948	1.63308	1.60797	2.23363	1.59433	1.10736	2.15212	2.59604	2.95918	1.96507	133	Regression
mean.p	1.89459	1.96272	1.51789	1.7568	2.51328	1.73076	1.42005	2.17301	2.0323	2.73553	2.02677
mean.r	1.78923	1.95958	1.30569	1.64127	2.30941	1.59763	1.32755	1.89499	1.95715	2.92497	1.91008
p.PvR	0.31	0.0073	0.14	0.0013	0.25	0.063	0.54	0.24	0.73	0.19	0.033
FDR.PvR	1	0.073	0.98	0.0143	1	0.504	1	1	1	1	0.297

## Sheet: Stroma mIHC
sampleID	All CD45	All T cells	B cells	CD4 T cells	CD8 Exhausted T cells	CD8 late effector T cells	CD8 T cells	Cytotoxic T cells	Dendritic Cells	Macrophages	Neutrophils	Treg	prop.cd8.grzb	prop.cd8.eomes
S134	0.222917	0.105	0.0360417	0.0765625	0.0084375	0.004375	0.0284375	0.00625	0.0136458	0.000104167	0.00197917	0.00958333	0.21978	81.1538
S20	0.65022	0.437004	0.00704846	0.171806	0.246696	0.0167401	0.265198	0.177093	0.0762115	0.0167401	0.00484581	0.0656388	0.667774	560.063
S143	0.422144	0.267889	0.00531195	0.162379	0.087595	0.0148943	0.10551	0.020727	0.0440579	0.000729091	0.00364545	0.0442662	0.196446	841.141
S57	0.457781	0.247732	0.124913	0.166085	0.0251221	0.0362875	0.0816469	0.0348918	0.0237264	0.000697837	0.00139567	0.0237264	0.42735	36.4444
S137	0.643034	0.475369	0.0342515	0.247265	0.108343	0.117764	0.228104	0.062515	0.0866267	0.0213972	0.00846307	0.0573253	0.274064	1357.52
S138	0.375775	0.212522	0.0233218	0.146759	0.0344574	0.0301502	0.0657632	0.0067234	0.0262633	0.000315159	0.0133417	0.0452779	0.102236	328.458
S149	0.55369	0.293947	0.0793947	0.0841625	0.209163	0.000621891	0.209784	0.146144	0.0267413	0.00435323	0.00518242	0.00891376	0.69664	1009
S150	0.43597	0.254713	0.000866739	0.169339	0.0588299	0.023727	0.0853738	0.0126761	0.00238353	0.000325027	0.00444204	0.0229686	0.148477	543.278
S151	0.657077	0.395872	0.00416927	0.135918	0.1207	0.136752	0.259954	0.045862	0.000208464	0.00166771	0.00375235	0.019804	0.176423	579.526
S18	0.138602	0.0247722	0.061214	0.0202682	0.000307094	0.0034804	0.00450404	0.000307094	0.000204729	0.000409458	0.000409458	0.0014331	0.0681818	3.77273
S39	0.232922	0.0617733	0.041061	0.0505087	0.00763081	0.00363372	0.0112645	0.00617733	0	0	0.00399709	0.0167151	0.548387	21.3226
S78	0.482019	0.203827	0.0160545	0.0625482	0.115078	0.0211277	0.141279	0.021513	0.00256871	0.000256871	0.00417416	0.011495	0.152273	1792.15
S86	0.347615	0.1375	0.0159452	0.0924912	0.0175795	0.0132951	0.0450088	0.00114841	0.00194346	0.000220848	0.00384276	0.0135601	0.0255152	398.295
S148	0.501131	0.42049	0.00411438	0.285127	0.0720016	0.0076116	0.135363	0.0302407	0.00452582	0.00246863	0.00493726	0.00802304	0.223404	350.056
S140	0.152254	0.0281007	0.0171159	0.0228637	0.00191595	0.000766381	0.00523694	0	0.00625878	0.00651424	0.00868566	0.000638651	0	15.1463
S152	0.330676	0.152642	0.0448775	0.120756	0.0233245	0.00501919	0.0318866	0.00620018	0.00354296	0.00177148	0.00620018	0.0168291	0.194444	79.1574
S154	0.292966	0.0626911	0.016208	0.0522936	0.0058104	0	0.0103976	0.00244648	0.00397554	0.00458716	0.00795107	0.00489297	0.235294	19
S133	0.0809304	0.0380623	0.0136486	0.0303729	0.000192234	0.000384468	0.00768935	0.000961169	0.00192234	0.000768935	0.00230681	0.00346021	0.125	1.05
S9	0.441481	0.234852	0.0750906	0.189539	0.0367685	0.00440186	0.0453133	0.0031072	0.00517866	0.00750906	0.00414293	0.0160539	0.0685714	142.097
S23	0.150307	0.0184049	0.0153374	0.0122699	0.00613497	0	0.00613497	0.00613497	0.00613497	0	0.0429448	0.00613497	1	2
S27	0.103493	0.0168176	0.00258732	0.0103493	0.00517464	0	0.00646831	0.00258732	0	0.00258732	0.0103493	0.00258732	0.4	4
S142	0.092511	0.0154185	0.00440529	0.0110132	0.00220264	0	0.00440529	0.00220264	0.0132159	0.00220264	0.00660793	0.00660793	0.5	1
S51	0.301493	0.0884668	0.0708277	0.075441	0.00488467	0.00244233	0.0130258	0.00189959	0.0122117	0.00597015	0.00841248	0.007327	0.145833	18.1875
S56	0.49705	0.144929	0.231928	0.0809581	0.00120833	0.00305637	0.0639704	0.00845831	0.00135049	0.0026299	0.000781861	0.00447793	0.132222	17.0478
S144	0.514827	0.0612102	0.0409738	0.053897	0.00170307	0.00170307	0.00731316	0.00010018	0.0451813	0.000801443	0.0118213	0.00991785	0.0136986	17.2329
S135	0.201613	0.0326246	0.0271261	0.026393	0.000366569	0.00293255	0.00623167	0	0.00733138	0.00109971	0.00256598	0.0109971	0	1.47059
S145	0.493167	0.160948	0.164001	0.115586	0.000436173	0.00116313	0.045362	0.000436173	0.00712416	0.00130852	0.0122129	0.0136668	0.00961538	3.02564
S146	0.405616	0.0436817	0.0167707	0.0378315	0.00156006	0.000390016	0.00585023	0	0.0113105	0	0.00390016	0	0	4.06667
p	0.5	0.79	0.19	0.75	0.66	0.51	0.45	0.51	0.66	0.42	0.29	0.62	0.76	0.97
